# Supplementary material
Source: Research Square preprint supplement (doi:10.21203/rs.3.rs-9847060/v1)
Supplement: Supplementary file 1 [file 0eca8548ac153b3c17010666.docx]

# Supplementary Material

Integrating private-sector adaptation investments in regional climate-economy modelling: an application to European river floods

Contents

[Supplementary Material 1](#_Toc230861772)

[A. Conceptual Background 2](#_Toc230861773)

[Firm capital stock depletion 2](#_Toc230861774)

[Firm adaptation 4](#_Toc230861775)

[B. Additional model characteristics 5](#_Toc230861776)

[C. List of flooding adaptation measures 7](#_Toc230861777)

[D. Modelling direct benefits of adaptation 10](#_Toc230861778)

[Choice of capital-benefit ratio for private adaptation investments 10](#_Toc230861779)

[Modelling public adaptation benefits 11](#_Toc230861780)

[E. Scenario considerations 12](#_Toc230861781)

[Regionalistion scenario through exposure ratios 12](#_Toc230861782)

[Top-100 most impacted European regions under a 3°C warming scenario 12](#_Toc230861783)

[References 13](#_Toc230861784)

## Conceptual Background

Flooding events can affect the economy through various channels, affecting all three major macroeconomic actors – households, firms, and government – directly and indirectly. Households are primarily affected through the direct damage to their homes, forcing them to reconstruct, which can deplete their savings (Allaire 2018) and constrain household consumption, particularly among low-income groups (Hallegatte et al. 2020). Households are also impacted indirectly through potential losses of income and increases in relative prices, as affected businesses could be forced to reduce their workforce, and relative scarcity could drive regional inflation. Similarly, governments are directly affected by floods through damage to critical infrastructure, primarily roads and bridges (Bednar-Friedl et al. 2015). Besides the opportunity cost of immediate reconstruction, governments might experience reduced tax revenues and increased debt servicing costs (Bachner and Bednar-Friedl 2019; Calcaterra et al. 2025). However, as our primary aim is to assess the effect of private-sector CCA, our conceptual background focuses on impact channels for firms and arising from firms (i.e., indirect macroeconomic effects (Botzen et al. 2019)).

### Firm capital stock depletion

Flood events have direct negative impacts on firms through the disruption of their production process (Gertz et al. 2019). Following the flooding event, production can be hindered due to various factors, including short-term disruptions to machinery and the inability of the labour force to work (Zhang et al. 2019), due to illness, damage to their homes, and disruptions to transportation networks. Additionally, local supply chains are likely to be affected, further restricting the ability of local businesses to produce (Inoue and Todo 2019). There is a rich economic literature that has conceptualised and assessed these short-term impacts, both empirically (Wedawatta et al. 2014; Zhou and Botzen 2021) and through modelling approaches (Li et al. 2013; Hallegatte et al. 2024).

However, there are lingering effects on the productive capacity of businesses that remain beyond the immediate aftermath of the flood. Starting at the individual firm level, the flood could have destroyed essential capital goods () (e.g., machinery, computers, etc.), the replacement of which can be both logistically and economically complex. This is particularly true for small- and medium-sized enterprises (SMEs) (Leitold et al., 2021; Skouloudis et al., 2023) – which represent more than 99% of all enterprises in the EU (Eurostat 2025), and for whom the functioning of a single machine can be the difference between survival and bankruptcy. Conceptually, in the event of a flood and assuming that labour () remains otherwise constant (i.e., no lives are lost or an immediate major displacement of population occurs), the output of a firm () is expected to be lower than in the no-flood counterfactual:

**(Eq. A.1)**

Where as a consequence of the capital depletion. This lower output is expected to hold in the majority of cases, unless there was idle capital in the first place and/or labour acted as the binding constraint to production (i.e., possible under a Leontief production function). The reduction in output has obvious consequences for the immediate profitability of the firm, which could be forced to close if it cannot finance the replacement of the damaged capital (Wedawatta et al. 2014).

Projecting this into the long term, lower firm output can hinder capital formation, as firm profits are reduced and can thus not be reinvested to replace old – or in this case, damaged – capital. Under these conditions, at the firm level, capital investment () is expected to be lower. Thus, using a standard capital accumulation function between two time periods, with a capital depreciation rate , we express the post-flood firm capital stock at time :

**(Eq. A.2a) in case of a flood**

**(Eq. A.2b) in case of no flood**

**(Eq. A.3)**

As capital accumulates over time, lower output can trap businesses in a low-growth trajectory, as both the current level of capital stock () and potential investment flows () are reduced following a flooding event. Aggregating these effects over an entire economic sector , when considering a particular regional economy that has been hit by a sufficiently large flood, we can derive an analogous expression to **Equation 1** for domestic sectoral output () at the region-sector level:

**(Eq. A.4)**

Note that domestic sectoral output does not necessarily fall due to flooding, as the micro-level output losses can be balanced by other effects. On the one hand, if the flooding event is small or highly localised, unaffected businesses could increase their output to meet local demand for both intermediate and final goods. On the other hand, even if the entire sector of a region is affected, excess demand for this sector’s output would drive its prices up, ultimately raising firm investments and thus rebuilding the destroyed capital.

However, in an open economy, the lower level of output would likely be at least partially compensated by an increase in imports () of goods and services. These foreign goods would become relatively more desirable to the region’s consumers as domestic prices spike relative to foreign prices in affected sectors (i.e., expenditure-switching effect); this effect could be more pronounced within a frictionless free trade area like the EU’s Internal Market. While the lower level of output can also apply a downward pressure on import demand (i.e., expenditure-reducing effect), we expect this secondary effect to be smaller in relative terms. Moreover, the reduction in domestic production will likely also negatively impact sector-wide exports (), as they are a component of domestic output.

In a nutshell, the same higher domestic prices that make imports more attractive will also reduce export demand in other regions. Conversely, localised flooding in a region could yield short-term benefits in neighbouring, unaffected regions. For instance, Dutch regions that are protected against floods could experience export gains as demand for their goods and services increases in Germany following a flood event. Thus, the effects of firm capital stock depletion due to flooding are not exclusively restricted to the replacement cost of damaged capital goods, but can also induce indirect impacts through changes in relative prices across neighbouring regions. In practice, this can lead to the aggregate economic loss at the European level being partially (or fully) mitigated through these changes in interregional trade.

### Firm adaptation

The flooding-induced depletion of firm capital stock and consequent output losses can be mitigated by implementing CCA measures (Mendelsohn 2012). Consequently, businesses would consider adaptation measures that have a positive effect on their production process (Filatova et al. 2025), as measured by their output:

**(Eq. A.5)**

Conceptually, the driving principle behind an investment in adaptation for any economic actor is the idea that its benefits () are higher than its costs () (Mendelsohn 2000). When studying the impacts of climate-induced hazards, benefits are commonly computed as the damage prevented through protective measures. Driven by their own self-interest, firms exclusively consider benefits that protect their assets and workforce. Focusing our analysis only on economic effects, we represent these benefits as the difference in output with and without the adaptation measures:

**(Eq. A.6)**

As with any investment undertaken by a business, an adaptation decision is subject to opportunity cost, and both costs and benefits of the measure are time-discounted. Thus, a CCA measure will be implemented if the time-discounted flow of benefits net of costs is positive, as measured by the net present value (NPV) of the CCA spending:

**(Eq. A.7)**

In the case of private sector adaptation, the empirical literature has shown that businesses tend to focus on current and short-term climate risks (Agrawala et al. 2011b; World Economic Forum 2023), implying a high discount rate () and a short time-horizon (). Besides its cost-effectiveness, the implementation of a CCA measure is also contingent on various socio-behavioural aspects, including risk aversion, previous experiences with climate hazards, the perceived likelihood of an extreme event occurring, or the perceived efficacy of the measure in the context of the specific firm (Leitold et al. 2021; Skouloudis et al. 2023; Revilla Diez et al. 2024).

Driven by these factors, firms can implement various CCA measures that can be classified into a range of typologies. Goldstein et al. (2019) distinguish between hard, structural measures that deliver direct private benefits to businesses (e.g., wet-proofing a building (de Moel et al. 2014)), and soft measures that help assess the feasibility of different protection choices (e.g., risk modelling), or increase the firm’s resilience by diversifying its supply chain. A third category in this classification is ecosystem-based adaptation (EbA) (e.g., green walls), which provide wider societal co-benefits, but is seldom implemented by the private sector (Filatova et al. 2025). Depending on their size and exposure to flooding, firms are likely to implement a combination of hard and soft CCA measures (Goldstein et al. 2019), to protect their interests in a cost-effective manner.

However, while the economic rationale to implement an adaptation measure is motivated by the benefit-cost relationship at the firm level, adaptation benefits can extend beyond the expected improvement in output. In the same way that climate damages can generate indirect economic impacts through supply chain disruptions and other cascading effects (Bachner et al. 2024; Mandel et al. 2025), adaptation measures can create second-order benefits across the economy. A common framework used to describe these benefits is the triple dividend of resilience (Heubaum et al. 2022); the direct benefits accrued from protecting economic activity represent the first dividend.

The other two dividends are indirect (positive) consequences of CCA investments, and can produce greater overall benefits than the first dividend. The second dividend includes financial co-benefits of adaptation and can materialise even in the absence of hazards, as the perceived resilience of the economy through protection measures encourages further investment and innovation (Xu et al. 2025). While additional economic benefits resulting from de-risking (McDermott 2016) are complex to capture in traditional macroeconomic models due to the limited development of macro-financial modules (Taylor 2016), other induced economic benefits from reducing climate damages can be embedded. For instance, adaptation measures that protect businesses producing intermediate inputs would trigger local economic benefits for the producers of the final goods, by preventing higher input prices. In macroeconomic frameworks, relative changes in sectoral output and GDP can capture these induced effects, thereby estimating the total economic gains from adaptation. Finally, the third dividend encompasses wider social and environmental co-benefits of adaptation (i.e., non-market benefits), which can be more challenging to quantify and thus to incorporate into firm decision-making (Heubaum et al. 2022). As we focus on quantifying the macroeconomic impacts of CCA investments, we do not explicitly consider non-economic benefits in our analysis (i.e., third dividend).

In summary, while private sector adaptation decisions are made at the firm level with the aim of reducing direct flood damage, considering induced benefits (and costs) arising across sectors and regions is essential. We have developed our macroeconomic modelling framework with the aim of capturing the total economic impact of adaptation investments to regional economies. Specifically, we consider that the effect of these investments permeates beyond the industry implementing the measure, through changes in relative prices that affect domestic output and interregional trade.

## Additional model characteristics

The model is calibrated on the 2015 multi-regional input-output (MRIO) table EUREGIO, which incorporates national, European, and international data (Ivanova et al. 2019b). The MRIO table includes inter-country input-output data from the OECD (OECD 2021), international trade data from BACI (Gaulier and Zignago 2010), national Supply and Use tables and regional statistics from Eurostat (2019), and to estimate interregional trade flows within Europe, the regional transport database ETIS-Plus from the European Commission (Thissen et al. 2019). A complete mathematical description of the core mechanisms within the EU-EMS and extensive explanations on the implementation of these databases are provided by Ivanova et al. (2019a).

The sectoral aggregation for our analysis comprises 8 distinct economic sectors, stems from a combination of the 19 NACE Rev.2 Level 1 classification (Eurostat 2008). We map our sectors to this classification in **Table B.1** below. Additionally, we follow Cortés Arbués et al. (2024) and map our 8 sectors to the 5 asset classes of the ESPON-TITAN dataset, allowing us to distribute the total direct damage to a region across economic sectors (**Table B.2**). The asset type *Residential* is deliberately excluded to focus on impacts to the private sector, rather than households. Moreover, because the asset type *Transport and Infrastructure* refers mostly to roads and bridges, we assume that the government covers the loss of these publicly owned assets through its budget.

**Table B.1**: Mapping of 19 sectors in the NACE Rev.2 classification (Level 1, A-S) to the aggregated sectors considered in the CGE model.

| Sector in the CGE model | NACE Rev.2 Level 1 economic sectors (A-T) |
| --- | --- |
| Agriculture | (A) Agriculture, forestry, and fishing |
| Industry | (B) Mining and quarrying  (C) Manufacturing |
| Utilities | (D) Electricity, gas, steam, and air conditioning supply  (E) Water supply; sewerage, wastewater management, and remediation activities |
| Construction | (F) Construction |
| Transport and Logistics | (G) Wholesale and retail trade; repair of motor vehicles and motorcycles  (H) Transportation and storage |
| Private Services | (I) Information and communication  (J) Financial and insurance activities  (K) Real estate activities  (L) Professional, scientific and technical activities  (N) Administrative and support service activities  (S) Other service activities |
| Public Sector | (O) Public administration and defence; compulsory social security |
| Other Public Services | (P) Education  (Q) Human health and social work activities  (R) Arts, entertainment, and recreation |

**Table B.2**: Asset class to sector relationship when distributing direct flooding damages.

| **Asset class** | **Sector(s)** |
| --- | --- |
| Arable land | Agriculture |
| Commercial | Construction, Transport and Logistics, Private Services, Public Sector, Other Public Services |
| Industry | Industry, Utilities |

## List of flooding adaptation measures

Th adaptation investments accounted for in the underlying dataset first presented in Cortés Arbués et al. (2025) include transactions related to the flooding adaptation measures listed below. Note that the dataset does not provide the relative expenditure share of each measure for each sector; this level of granularity can be found in the analysis of Filatova et al. (2025) for 5 subnational regions around the world, including Zuid-Holland (NL33) in the Netherlands.

- Adaptation and Management of Farm Equipment (incl. training)
- Advanced risk modelling
- Consulting
- Cultivation of New Crops Enabled by Climate Change
- Embedding Climate Change Risk in Energy Infrastructure Planning
- Erection of flood barriers
- Evacuation services
- Excavation of new or extension of existing dykes/ditches/droves
- Finance
- Flood Protection for Power Stations
- Forestry Services (incl. Afforestation)
- Green roofing and walls
- Hydropower Reservoir Stations: increase in dam height
- Improved New Species
- Improvements in Agricultural Management (incl. crop & soil and training)
- Improvements in Forest Management
- Increase Robustness of Transmission Grids
- Installation of green infrastructure e.g., reed beds, river re-wiggling etc.
- Installation of porous hard standing
- Installation of temporary flood barriers
- Insurance
- Management of External Mineral and Energy Resources
- Management of Timber Resources
- New Distribution Systems
- New Transmission Systems
- Pest Suppression Systems and Practices
- Pumping equipment
- Retrofit building services
- Sand bags
- Storm Water (management, treatment, planning)
- Stormwater civil engineering for new developments
- Stormwater mitigation measures
- Structural Surveys
- Supply Chain Management (all)
- Sustainable drainage and water management
- Sustainable Sourcing Consulting
- Underground Cable Installation

## Modelling direct benefits of adaptation

### Choice of capital-benefit ratio for private adaptation investments

We estimate the benefits of adaptation investments for each sector-region by deriving uniform capital-benefit ratios for public and private adaptation based on the work of Dottori et al. (2023). Using the expected annual damages (EAD) due to river flooding from the PESETA-IV project as a baseline (i.e., 3°C warming scenario), Dottori et al. (2023) estimate benefit-cost ratios (BCR) of 4 different adaptation strategies (detention areas, dyke strengthening, flood proofing, relocation) across Europe. Given the nature of private adaptation measures (i.e., physically smaller in scope, focused on protecting only private assets within a given area), we focus on the **BCR results of the flood-proofing strategy**. The critical assumptions underlying their methodology can be summarized as follows:

1. each strategy is implemented individually (i.e., only dyke strengthening, or only flood proofing),
2. each strategy is implemented between 2020-2100 with time-discounting of 5% per year to estimate the net present value (NPV) of each project,
3. each measure is implemented in a particular year (i.e., 2020 and 2060 for flood-proofing), while only maintenance costs are included in the intermediate years,
4. for flood-proofing, the NPV is estimated at a 5km x 5km (25km2) grid resolution, and
5. each strategy is only implemented at the local scale if NPV > 0.

Once the NPVs at the 25km2 level are obtained, they are aggregated to the regional and country level, and finally the European level. Given that our adaptation investments are prescribed based on the current public and private adaptation rates (i.e., we assume that the measures are being implemented, we do not seek to assess their feasibility), and that adaptation capital accumulates over time in the CGE model, we cannot use the benefit-cost ratios directly. On the one hand, the private sector should obtain benefits from installed adaptation capital at every timestep. On the other hand, these benefits need not be discounted, as our approach does not look to assess whether implementing the measure is logical at the starting year (i.e., this is also because new investments in adaptation are occurring at every time-step).

Given these considerations, we take the average BCR of the flood proofing strategy for Europe (2.4), and look to match accumulated benefits from adaptation capital over time to this ratio. As capital depreciates over time at a rate of 5% per year (Agrawala et al. 2011a), 77.4% of the original installed adaptation capital remains after 5 years, 59.9% after 10 years, and so on (see column 2 in **Table D.1**). In order for our accumulated capital to be comparable to the BCR, we discount the benefits obtained from our capital at an additional 5% per year (column 3 in **Table D.1**). After 30 years, which we assume to be the average lifespan of private adaptation measures, the accumulated discounted benefits for a KBR = 1.0 approximately match the BCR = 2.4 of (Dottori et al. 2023) (column 4 in **Table D.1**). Note that the total adaptation benefits accrued beyond the 30 years are small given the high depreciation rate.

Notably, we use a single value for the KBR throughout the simulation (i.e., using the European average). Given the differences between our approach and that of the original authors, we envision this choice as a first attempt at implementing our methodology, and leave the inclusion of country-, sector-, and region-specific ratios to future work.

**Table D.1**: Estimation of capital-benefit ratio for private adaptation investments from the flood-proofing BCR of Dottori et al. (2023). The table shows the accumulation of discounted benefits for a KBR = 1.0 and how the accumulation approximately matches the flood-proofing BCR of Dottori et al. (2023) after 30 years.

| **Years after Implementation** | **Undiscounted Benefits (KBR = 1.0)** | **Discounted Benefits (5%) (KBR = 1.0)** | **Cumulative Discounted Benefits** |
| --- | --- | --- | --- |
| 0 | 1.000 | 1.000 | 1.000 |
| 5 | 0.774 | 0.599 | 1.599 |
| 10 | 0.599 | 0.358 | 1.957 |
| 15 | 0.463 | 0.214 | 2.172 |
| 20 | 0.358 | 0.129 | 2.300 |
| 25 | 0.277 | 0.077 | 2.377 |
| 30 | 0.214 | 0.046 | ***2.423 ≈ 2.4*** |
| … | … | … | … |
| 80 | 0.017 | 0.0003 | 2.492 |

### Modelling public adaptation benefits

Our modelled private adaptation benefits materialise in sector- and region-specific contexts, mimicking the expected behaviour of firms looking to protect their interests when facing a flood. However, European regions have historically implemented public protection measures as well, and ignoring their benefits would significantly overestimate the climate risk faced by firms. The rate of public adaptation investment is estimated using public adaptation expenditure data from Cortés Arbués et al. (2025), although it is defined relative to GDP instead of to GFCF (ranging from 0.005% to 0.05% of GDP). We assume that public adaptation capital accumulates analogously to private capital (i.e., ). On the spending side, public adaptation expenditures are explicitly included in the government consumption function of the CGE model. It is worth noting that the ‘Public Sector’ does not invest in private adaptation and does not derive private adaptation benefits. The country-level rate of public adaptation is maintained at a constant level until 2100 and is part of our baseline scenario.

Similarly to private adaptation, we seek to obtain a uniform, first estimate for the KBR of public adaptation. Instead of using estimates for the flood-proofing measures, we consider the average BCRs for detention areas (4.2) and dyke strengthening (3.3), as these are traditional examples of public adaptation measures. We assume a weighted-average BCR of 3.7 given the relative costs estimated per year estimated by Dottori et al. (2023) (see their Table 1), and follow a similar approach to the one above for private adaptation. Critically, we assume that public benefits last longer than private benefits, and thus compare the value of accumulated discounted benefits after 50 years. Thus, a KBR = 1.5 is approximately comparable to the average BCR = 3.7 (see column 4 in **Table D.2**). Finally, we account for public adaptation benefits (), which reduce direct flooding on the entire regional economy.

**(Eq. D.1)**

**Table D.2**: Estimation of capital-benefit ratio for public adaptation investments from the BCRs of detention areas and dyke strengthening of Dottori et al. (2023). The table shows the accumulation of discounted benefits for a KBR = 1.5 and how the accumulation approximately matches the average BCR of detention areas and dyke strengthening (i.e., BCR = 3.7) of Dottori et al. (2023) after 50 years.

| **Years after Implementation** | **Undiscounted Benefits (KBR = 1.5)** | **Discounted Benefits (5%) (KBR = 1.5)** | **Cumulative Discounted Benefits** |
| --- | --- | --- | --- |
| 0 | 1.500 | 1.500 | 1.500 |
| 5 | 1.161 | 0.898 | 2.398 |
| 10 | 0.898 | 0.538 | 2.936 |
| 15 | 0.695 | 0.322 | 3.258 |
| 20 | 0.538 | 0.193 | 3.451 |
| 25 | 0.416 | 0.115 | 3.566 |
| 30 | 0.322 | 0.069 | 3.635 |
| 35 | 0.249 | 0.041 | 3.676 |
| 40 | 0.193 | 0.025 | 3.701 |
| 45 | 0.149 | 0.015 | 3.716 |
| 50 | 0.115 | 0.009 | ***3.725 ≈ 3.7*** |
| … | … | … | … |
| 80 | 0.025 | 0.0004 | 3.738 |

## Scenario considerations

### Regionalistion scenario through exposure ratios

Sectoral adaptation rates are not likely to be constant within a country, but due to the limitations of our dataset we assume these rates are constant in a basic, non-regionalised scenario **R0**. To mitigate this, we construct a regionally-scaled scenario type **R1,** in which the adaptation rate varies according to the relative flood exposure of a region compared to the country’s average. Using the direct flooding damage as a share of GDP from Dottori et al. (2023) as a proxy for regional flood exposure (denoted by ), we compute an equivalent average for the country weighted by regional GDP for every timestep between 2020 and 2100 (, where ). Taking the average of these ratios over time for consistency, we compute a new regionally-distinct adaptation rate for **R1**:

**(Eq. E.1)**

Thus, in a highly impacted region, the exposure ratio would be higher than 1, and , while the opposite would be true in a low-impact region. Overall, the country-level adaptation rate in **R1** would remain the same as in **R0**.

### Top-100 most impacted European regions under a 3°C warming scenario

To construct the adaptation rate growth scenario family (i.e., the G1 scenarios), we extracted the top-100 most flood-affected NUTS2 regions by GDP by comparing a scenario without river flood damages (i.e., no climate change) with the 3°C warming scenario without any adaptation benefits, public or private. These 100 regions increase their private adaptation investment rate in the G1 counterfactual scenarios. Below, we list them along with their relative GDP change by 2100 for reference.

**Table E.1**: GDP losses of the top-100 most flood-affected regions in the EU27 and UK by 2100.

| HU33 | -34.5% | EE00 | -7.1% | BG32 | -4.3% | HU21 | -2.4% | SE21 | -1.6% |
| --- | --- | --- | --- | --- | --- | --- | --- | --- | --- |
| LV00 | -29.3% | CZ05 | -7.0% | UKE1 | -4.2% | FR21 | -2.4% | FR42 | -1.6% |
| CZ04 | -27.8% | PL33 | -6.1% | SK04 | -3.8% | PL62 | -2.3% | ITH2 | -1.6% |
| BG31 | -24.0% | BG42 | -6.0% | DEB1 | -3.8% | ITH3 | -2.2% | UKC2 | -1.6% |
| HU22 | -23.2% | CZ06 | -5.9% | RO12 | -3.7% | DE60 | -2.2% | UKK1 | -1.5% |
| HU23 | -22.2% | LT00 | -5.8% | ITI2 | -3.7% | SI02 | -2.1% | UKG1 | -1.5% |
| HU31 | -21.7% | PL63 | -5.7% | FI19 | -3.7% | ES24 | -2.1% | UKD1 | -1.5% |
| RO22 | -16.6% | BG34 | -5.7% | SE33 | -3.7% | BG33 | -2.0% | EL12 | -1.5% |
| HU32 | -15.5% | PL42 | -5.4% | PL51 | -3.6% | AT31 | -2.0% | DE40 | -1.4% |
| PL43 | -14.0% | UKL2 | -5.2% | SE12 | -3.5% | BE23 | -2.0% | BE22 | -1.4% |
| SE23 | -13.2% | BE35 | -5.2% | RO11 | -3.3% | UKJ1 | -2.0% | PL12 | -1.4% |
| CZ02 | -12.9% | RO31 | -5.1% | AT12 | -3.2% | UKE2 | -2.0% | DEB3 | -1.4% |
| CZ03 | -11.9% | SK03 | -4.9% | PL61 | -3.2% | UKF1 | -1.8% | SE32 | -1.4% |
| SK02 | -9.7% | DEB2 | -4.9% | PL32 | -3.1% | UKG2 | -1.8% | UKJ2 | -1.4% |
| HR00 | -9.7% | CZ07 | -4.9% | BE33 | -3.1% | PL41 | -1.7% | ITI3 | -1.4% |
| FI1D | -9.4% | ITI1 | -4.7% | CZ08 | -2.9% | CZ01 | -1.7% | BG41 | -1.3% |
| SK01 | -8.0% | RO42 | -4.7% | DE72 | -2.9% | FR22 | -1.7% | AT32 | -1.3% |
| RO41 | -7.8% | PL52 | -4.7% | PL21 | -2.8% | DE71 | -1.6% | ES41 | -1.3% |
| SI01 | -7.6% | SE31 | -4.5% | DE73 | -2.7% | DE50 | -1.6% | DE22 | -1.3% |
| FI1C | -7.3% | RO21 | -4.4% | DEE0 | -2.7% | DE26 | -1.6% | AT33 | -1.3% |

## References

Agrawala S, Bosello F, Carraro C, et al (2011a) Plan or React? Analysis of Adaptation Costs and Benefits Using Integrated Assessment Models. Clim Chang Econ (Singap) 02:175–208. https://doi.org/10.1142/S2010007811000267

Agrawala S, Carraro M, Kingsmill N, et al (2011b) Private Sector Engagement in Adaptation to Climate Change. OECD Environment Working Papers. https://doi.org/10.1787/5kg221jkf1g7-en

Allaire M (2018) Socio-economic impacts of flooding: A review of the empirical literature. Water Secur 3:18–26. https://doi.org/10.1016/j.wasec.2018.09.002

Bachner G, Bednar-Friedl B (2019) The Effects of Climate Change Impacts on Public Budgets and Implications of Fiscal Counterbalancing Instruments. Environmental Modeling and Assessment 24:121–142. https://doi.org/10.1007/s10666-018-9617-3

Bachner G, Knittel N, Poledna S, et al (2024) Revealing indirect risks in complex socioeconomic systems: A highly detailed multi‐model analysis of flood events in Austria. Risk Analysis 44:229–243. https://doi.org/10.1111/risa.14144

Bednar-Friedl B, Wolkinger B, König M, et al (2015) Transport. In: Economic Evaluation of Climate Change Impacts, 1st edn. Springer Cham, pp 279–300

Botzen WJW, Deschenes O, Sanders M (2019) The Economic Impacts of Natural Disasters: A Review of Models and Empirical Studies. Rev Environ Econ Policy 13:167–188. https://doi.org/10.1093/reep/rez004

Calcaterra M, Consiglio A, Martorana V, et al (2025) Sovereigns on thinning ice: Debt sustainability, climate impacts and adaptation. In: Bruegel Working Papers 06/2025. https://www.bruegel.org/working-paper/sovereigns-thinning-ice-debt-sustainability-climate-impacts-and-adaptation. Accessed 25 Sep 2025

Cortés Arbués I, Chatzivasileiadis T, Ivanova O, et al (2024) Distribution of economic damages due to climate-driven sea-level rise across European regions and sectors. Sci Rep 14:126. https://doi.org/10.1038/s41598-023-48136-y

Cortés Arbués I, Chatzivasileiadis T, Storm S, et al (2025) Private investments in climate change adaptation are increasing in Europe, although sectoral differences remain. Commun Earth Environ 6:470. https://doi.org/10.1038/s43247-025-02454-3

de Moel H, van Vliet M, Aerts JCJH (2014) Evaluating the effect of flood damage-reducing measures: A case study of the unembanked area of Rotterdam, the Netherlands. Reg Environ Change 14:895–908. https://doi.org/10.1007/s10113-013-0420-z

Dottori F, Mentaschi L, Bianchi A, et al (2023) Cost-effective adaptation strategies to rising river flood risk in Europe. Nat Clim Chang 13:196–202. https://doi.org/10.1038/s41558-022-01540-0

Eurostat (2025) Enterprise statistics by size class and NACE Rev. 2 activity (from 2021 onwards). In: Database. https://ec.europa.eu/eurostat/databrowser/product/page/SBS_SC_OVW. Accessed 13 Dec 2025

Eurostat (2019) ESA supply, use and input-output tables. In: Database. https://ec.europa.eu/eurostat/web/esa-supply-use-input-tables/database. Accessed 15 Sep 2025

Eurostat (2008) NACE Rev. 2: Statistical classification of economic activities in the European Community. Luxembourg

Filatova T, Taberna A, Chatzivasileiadis T, Cortés Arbués I (2025) Private sector investments in climate change adaptation. Nat Clim Chang 15:1249–1256. https://doi.org/10.1038/s41558-025-02423-w

Gaulier G, Zignago S (2010) BACI: International Trade Database at the Product-level The 1994-2007 Version

Gertz AB, Davies JB, Black SL (2019) A CGE Framework for Modeling the Economics of Flooding and Recovery in a Major Urban Area. Risk Analysis 39:1314–1341. https://doi.org/10.1111/risa.13285

Goldstein A, Turner WR, Gladstone J, Hole DG (2019) The private sector’s climate change risk and adaptation blind spots. Nat Clim Chang 9:18–25. https://doi.org/10.1038/s41558-018-0340-5

Hallegatte S, Jooste C, McIsaac F (2024) Modeling the macroeconomic consequences of natural disasters: Capital stock, recovery dynamics, and monetary policy. Econ Model 139:106787. https://doi.org/10.1016/j.econmod.2024.106787

Hallegatte S, Vogt-Schilb A, Rozenberg J, et al (2020) From Poverty to Disaster and Back: a Review of the Literature. Econ Disaster Clim Chang 4:223–247. https://doi.org/10.1007/s41885-020-00060-5

Heubaum H, Brandon C, Tanner T, et al (2022) The Triple Dividend of Building Climate Resilience: Taking Stock, Moving Forward. World Resources Institute. https://doi.org/10.46830/wriwp.21.00154

Inoue H, Todo Y (2019) Firm-level propagation of shocks through supply-chain networks. Nat Sustain 2:841–847. https://doi.org/10.1038/s41893-019-0351-x

Ivanova O, Kancs d’Artis, Thissen M (2019a) EU Economic Modelling System. https://doi.org/10.2791/184008

Ivanova O, Kancs D, Thissen M (2019b) Regional Trade Flows and Input-Output Data for Europe. In: European Commission. https://publications.jrc.ec.europa.eu/repository/handle/JRC118892. Accessed 23 Dec 2025

Leitold R, Garschagen M, Tran V, Revilla Diez J (2021) Flood risk reduction and climate change adaptation of manufacturing firms: Global knowledge gaps and lessons from Ho Chi Minh City. International Journal of Disaster Risk Reduction 61:102351. https://doi.org/10.1016/j.ijdrr.2021.102351

Li J, Crawford-Brown D, Syddall M, Guan D (2013) Modeling imbalanced economic recovery following a natural disaster using input-output analysis. Risk Analysis 33:1908–1923. https://doi.org/10.1111/risa.12040

Mandel A, Battiston S, Monasterolo I (2025) Mapping global financial risks under climate change. Nat Clim Chang 15:329–334. https://doi.org/10.1038/s41558-025-02244-x

McDermott TKJ (2016) Investing in Disaster Risk Management in an Uncertain Climate. In: Surminski S, Tanner T (eds) Realising the “Triple Dividend of Resilience” . Climate Risk Management, Policy and Governance. Springer, Cham, pp 129–149

Mendelsohn R (2012) The economics of adaptation to climate change in developing countries. Clim Chang Econ (Singap) 03:1250006. https://doi.org/10.1142/S2010007812500066

Mendelsohn R (2000) Efficient Adaptation to Climate Change. Clim Change 45:583–600. https://doi.org/10.1023/A:1005507810350

OECD (2021) OECD inter-country input–output (ICIO) tables

Revilla Diez J, Leitold R, Tran V, Garschagen M (2024) Micro-business participation in collective flood adaptation: Lessons from scenario-based analysis in Ho Chi Minh City, Vietnam. Natural Hazards and Earth System Sciences 24:2425–2440. https://doi.org/10.5194/nhess-24-2425-2024

Skouloudis A, Leal Filho W, Vouros P, et al (2023) Assessing Greek small and medium‐sized enterprises’ flood resilience capacity: Index development and application. J Flood Risk Manag 16:e12858. https://doi.org/10.1111/jfr3.12858

Taylor L (2016) CGE applications in development economics. J Policy Model 38:495–514. https://doi.org/10.1016/j.jpolmod.2016.02.010

Thissen M, Ivanova O, Mandras G, Husby T (2019) European NUTS 2 regions: construction of interregional trade-linked Supply and Use tables with consistent transport flows.

Wedawatta G, Ingirige B, Proverbs D (2014) Small businesses and flood impacts: The case of the 2009 flood event in Cockermouth. J Flood Risk Manag 7:42–53. https://doi.org/10.1111/jfr3.12031

World Economic Forum (2023) Taking Stock of Business Efforts to Adapt to Climate Change. https://www3.weforum.org/docs/WEF_Taking_Stock_of_Business_Efforts_to_Adapt_to_Climate_Change_2023.pdf. Accessed 14 Nov 2025

Xu J, Cai D, Zhu J (2025) Navigating the green wave: Urban climate adaptation and firms’ investment decisions-evidence from China. Energy Econ 141:108087. https://doi.org/10.1016/j.eneco.2024.108087

Zhang Z, Li N, Cui P, et al (2019) How to Integrate Labor Disruption into an Economic Impact Evaluation Model for Postdisaster Recovery Periods. Risk Analysis 39:2443–2456. https://doi.org/10.1111/risa.13365

Zhou F, Botzen W (2021) Firm Level Evidence of Disaster Impacts on Growth in Vietnam. Environ Resour Econ (Dordr) 79:277–322. https://doi.org/10.1007/s10640-021-00562-0
